# Supplementary material for: A Data-Driven Framework for Clinical Decision Support Systems in Positive Airway Pressure and Oxygen Titration
Source: Preprints.org preprint supplement (doi:10.20944/preprints202312.0689.v1), 2023-12-11
Supplement: Supplementary file 1 [file supplementary]

Annex 1

| **Patient** | | | **Sex** | | **Height, cm** | | | | | **Weight, kg** | | | **Age, y** | **BMI** | **AHI (initial)** | | | **AHI**  **(after)** | **SpO2 (initial)** | **SpO2 (after)** | **Diagnosis** |
| --- | --- | --- | --- | --- | --- | --- | --- | --- | --- | --- | --- | --- | --- | --- | --- | --- | --- | --- | --- | --- | --- |
| 1 | | | M | | 175 | | | | | 130 | | | 65 | 42 | 88 | | | **31** | 80 | **86,4** | Severe OSA, Type 2 Respiratory Failure, Grade 3 Obesity. |
| 2 | | | M | | 148 | | | | | 51 | | | 75 | 23 | 21,4 | | | **40** | 88 | **91,7** | Kyphoscoliosis, Moderate OSA. |
| 3 | | | M | | 170 | | | | | 145 | | | 50 | 50 | 53,5 | | | **2** | 75,5 | **80,2** | Severe OSA, Grade 3 Obesity, Hypoxemia, Hypercapnia, Obesity Hypoventilation Syndrome |
| 4 | | | F | | 164 | | | | | 119 | | | 59 | 44 | 75 | | | **22,1** | 87 | **92,1** | Severe OSA, Chronic Type 1 Respiratory Failure, Grade 3 Obesity |
| 5 | | | F | | 164 | | | | | 93 | | | 60 | 34,6 | 42,9 | | | **1,3** | 83,8 | **90,7** | Severe OSA, High-Output Cardiac Failure (B), Bilateral Positive Airway Pressure (BiPAP), Type 1 Respiratory Failure |
| 6 | | | M | | 176 | | | | | 130 | | | 67 | 42 | 83,4 | | | **6,6** | 68,8 | **90,7** | Severe OSA, Grade 1 Obesity, Type 2 Respiratory Failure. |
| 7 | | | M | | 178 | | | | | 106 | | | 65 | 33 | 109,2 | | | **25,7** | 67,1 | **79,2** | Severe OSA, Grade 1 Obesity, Nocturnal Hypoxemia, High-Output Positive Airway Pressure (BiPAP). |
| 8 | | | M | | 170 | | | | | 93 | | | 79 | 32 | 65,1 | | | **11,1** | 81,2 | **91,1** | Severe OSA, Grade 3 Obesity, Night Hopyxemia, COPD (B) |
| 9 | | | M | | 177 | | | | | 135 | | | 71 | 44 | 29 | | | **14** | 90 | **94** | Moderate OSA. |
| 10 | | | F | | 169 | | | | | 150 | | | 59 | 52,5 | 84,7 | | | **18** | 78 | **87,3** | Severe OSA, Grade 3 Obesity, Hypoxemia, Obesity-Related Hypoventilation during Sleep. |
| 11 | | | F | | 165 | | | | | 150 | | | 69 | 55 | 87,2 | | | **7,3** | 74,9 | **88,2** | Severe OSA, Grade 3 Obesity, Type 2 Respiratory Failure, Obesity Hypoventilation Syndrome. |
| 12 | | | M | | 177 | | | | | 135 | | | 62 |  | 41,6 | | | **46,8** | 87,4 | **87,8** | Severe OSA, Grade 3 Obesity, Nicotine Dependence, Type 1 Respiratory Failure. |
| 13 | | | M | | 186 | | | | | 129 | | | 56 | 37 | 34 | | | **7,4** | 84,8 | **98,6** | Severe OSA, Hypoxemia, Type 1 Respiratory Failure, Grade 2 Obesity, High-Output Positive Airway Pressure (BiPAP), Type 2 Diabetes. |
| 14 | | | V | | 184 | | | | | 160 | | | 51 | 47 | 108,3 | | | **18,4** | 68,7 | **88,7** | Severe OSA, Grade 3 Obesity, Chronic Type 2 Respiratory Failure, Uncontrolled Persistent Bronchial Asthma, Arterial Hypertension, Chronic Heart Failure III F.C. (NYHA). |
|  |  |  | |  | |  |  |  |  | |  |  | | | |  |  |  | | |  |

Annex 2

| 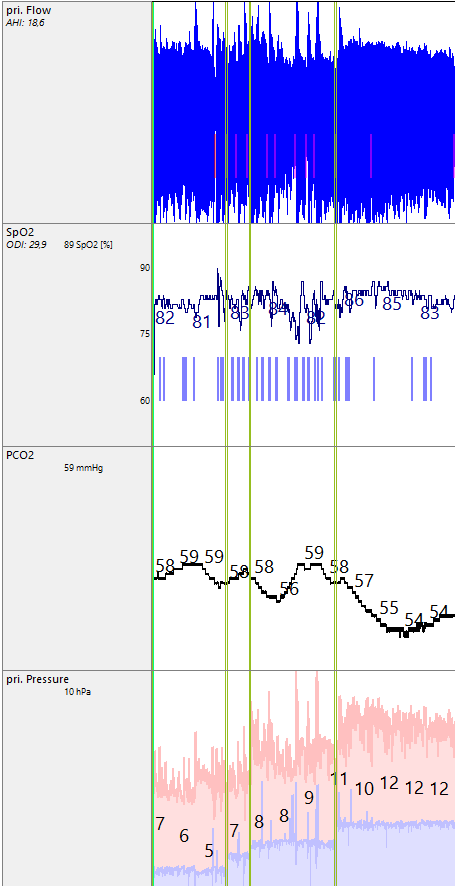 | 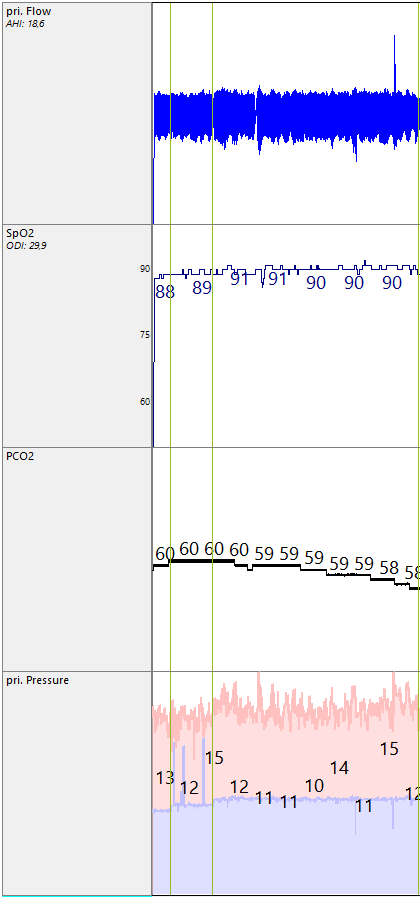 | 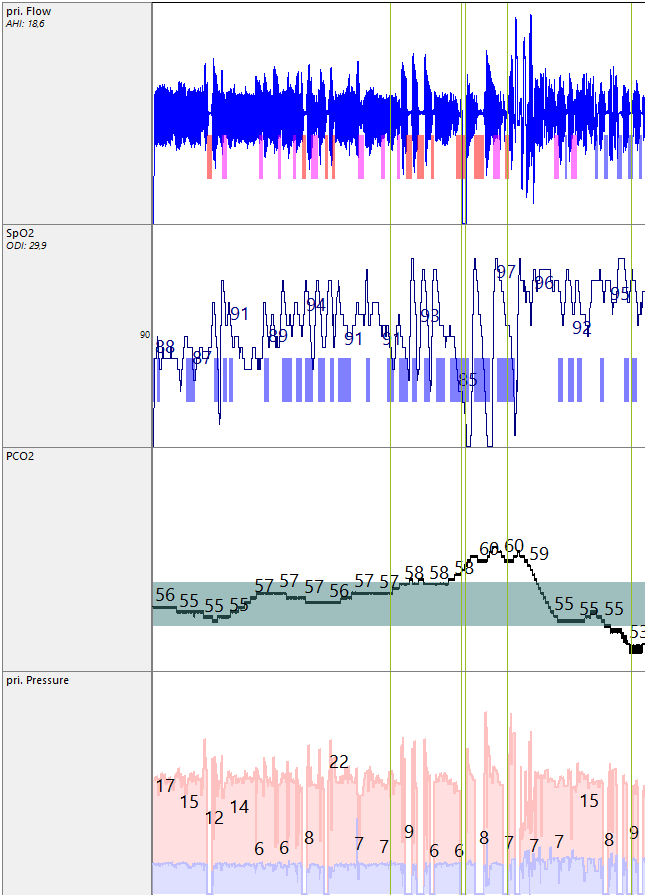 |
| --- | --- | --- |
| a) | b) | c) |
| Apnea vs CPAP pressure | pCO2 stabilized with later downtrend and additional oxygen is added | pCO2 rises with additional oxygen and then decreases when oxygen is decreases |
